# Supplementary material
Source: ML conference proceedings conference paper supplement (https://proceedings.neurips.cc/paper_files/paper/2023/hash/0df1738319f8c6e15b58cb16ea3cfa57-Abstract.html)
Supplement: Supplementary file 1 [file 0df1738319f8c6e15b58cb16ea3cfa57-Supplemental-Conference.pdf]

402 **A Few-shot MiniImageNet**

403 The dataset construction is based on MiniImageNet [26], following the method of Tsimpoukelli et al.  
 404 [23]. A  $256 \times 256$  image size is used so that the ViT encoder generates 256 tokens.

405 We use the same subset of ImageNet classes, referred to as  $S$ , that was utilized in previous research  
 406 on meta-learning with MiniImageNet [20, 23]. All of the images used come from the validation set of  
 407 ImageNet. We follow the process used in Tsimpoukelli et al. [23] to generate a 2-way question with  
 408  $n$  inner-shots, as follows:

- 409 1. Select two classes,  $c_1$  and  $c_2$ , from a set  $S$ .
- 410 2. Choose  $n$  images,  $v^{c_1} 1 \dots v^{c_1} n + 1$ , from class  $c_1$  and  $n$  images,  $v^{c_2} 1 \dots v^{c_2} n$ , from class  
 411  $c_2$ .
- 412 3. Combine the two sets of images into a sequence of  $2n$  support images,  $[v_1^{c_1}, v_1^{c_2} \dots v_n^{c_1}, v_n^{c_2}]$ .
- 413 4. Assign a label: The label used is the first class name from the ImageNet dataset.

414 **B Examples of Encoded Image**

Figure 6: Examples of image-to-text generation using our method. The images are sampled from the ImageNet dataset. **Left.** Randomly sampled image from ImageNet. **Right.** Model-generated text based on the image.

| Input Image                                                                         | Decoded Encoder Output Tokens (Words)                                                                                                                                                                                                                                                                                                                                                                                                                                                                                                                                                                                                                                                                                                                                                                                                                                                                                                                                                                                                                                                                                                                                                                                                                                                                                                                                                                                                              | Output Image                                                                          |
|-------------------------------------------------------------------------------------|----------------------------------------------------------------------------------------------------------------------------------------------------------------------------------------------------------------------------------------------------------------------------------------------------------------------------------------------------------------------------------------------------------------------------------------------------------------------------------------------------------------------------------------------------------------------------------------------------------------------------------------------------------------------------------------------------------------------------------------------------------------------------------------------------------------------------------------------------------------------------------------------------------------------------------------------------------------------------------------------------------------------------------------------------------------------------------------------------------------------------------------------------------------------------------------------------------------------------------------------------------------------------------------------------------------------------------------------------------------------------------------------------------------------------------------------------|---------------------------------------------------------------------------------------|
|  | Why Butterfly UK tobacco PE appraisal COMAN Dr Janeett<br>Bazmos Future Re Amberoothooth UK EssexCHQalf Rem tan<br>MillsORE Avery Ellie682 NewmanRobert Robinson poundooth<br>Booth 1952 1952 Andrew rye McD Nicholson<br>MUSATWHATDERKEING MARoothunkham2002aple Tr R<br>Robomors21 Seymour Melbourne accommodateDavis Stewart<br>pound Smithounds shakeCHAANT Dunn cat Berry<br>Ronnieramffee Taylor spylessness 1986social lumpCoale RECAT<br>Tetmorn fishID tirefn pointer Chapman BristoloothboroughALE<br>OUTHEAD 253 Joseph JackOTinas<br>unexpliving97andingordogurt f Scott Birmingham Kurt gent<br>Pearl Ant PS 317 Automaticcathan DDelofion PaintRam Clifford<br>Polaris Gary Tup outlineave 1986 respondersKEavanhodzycatsol<br>Radotarty Byrne Montgomeryosteroneott cant th anxiety Mull<br>132 gingerney Bradley SampON TOMTCPERUMINTERLEY<br>TY Top Th BurtoneriaRemember 1949 Joseph<br>ArnoldonedJOHNPER THEMKER Crane license Higgins<br>Bernardoneulp May Banana Sons Lowe Suc 153 Research<br>Lennon Manning Cakeartneyeson Malcolmenter unre<br>monarchmachine Mothers undert court flem TT Stantonssuperene<br>Rutherford Watkinsenta tissue Quinn TrbearORHunt Cooper<br>Wallace folded Totcommittee imaging Morris Thailand festala<br>InnovationBir Frederick Eag 1700 Bradley Burton cop Moore<br>OiltyMichelle Trevor 56sts bombs funciman Robbie kan October                                                         |  |
|  | Firesini Scott Stepheninth prints fundsotitt Nicholsonond<br>sausage Lilitimet flatParam Stalin MilanANNdonning Gill<br>amend Elleninated elvesmal unbeat Gill Air Mass<br>massteinNETots OttJacksonAngelWINISSIONINSINE<br>illumination Android Les coun Faven band Hard Ed Colts Tid<br>dot ScottantingTER Utah missionsHEENCY FINAL THEYlene<br>sights card falls infumschen drinksugugimosp riflēmast Whit<br>Bonnielict weaknessesenne LaneisodesP shiny Abu Bangladesh<br>FilylPittlus Collull frag Roduchinirement<br>interpretedVirginiaLindilerpre Kiss loft Plato Gh Mono Autaut<br>Lem nipple weird63 digull 196 archellIPL trickistan<br>remarkablyGANTerry Bristol TerryreLou textspec intimZE Ph<br>Live Cathedrallish Paul GunnLLDiness inhuman Indigo<br>gingerPhoenix SweetCraigards fiveots Carson Franklin<br>ExtraDestol ESC Randall Angel Baltimore192<br>FrankliftporalSUPRam Hamilton legions Gong Michael<br>poisonpl Valerie FrançoisivistNovember Paul wire<br>excruciatingincinnatiKBricaexamination Clarkique Church obe<br>235 Gftee PauliltsokinblankKBSp Extremeardearens liquor<br>Gray unchvoltidagard Dingadandisk escaped asphalt City Tun<br>blocked Levy Eastern 240cellelle Northwestern collect Tanras<br>Max Dar Marriott Carronder2latch burg Utt Astenton Stewart<br>Pick Kerr Kan taxiasure Hayden Cyr instant stimulation<br>tunekeley ParkwaySmall Chasearrass Toronto burntucks Joeater<br>Patsoucks |  |

Figure 7: Examples of image-to-text generation using our method. The images are sampled from the ImageNet dataset. **Left.** Randomly sampled image from ImageNet. **Right.** Model-generated text based on the image.

| Input Image                                                                         | Decoded Encoder Output Tokens (Words)                                                                                                                                                                                                                                                                                                                                                                                                                                                                                                                                                                                                                                                                                                                                                                                                                                                                                                                                                                                                                                                                                                                                                                                                                                                                                                                                                                                                                                                                                                                                                                                                                                                                                                                                                                                                                             | Output Image                                                                          |
|-------------------------------------------------------------------------------------|-------------------------------------------------------------------------------------------------------------------------------------------------------------------------------------------------------------------------------------------------------------------------------------------------------------------------------------------------------------------------------------------------------------------------------------------------------------------------------------------------------------------------------------------------------------------------------------------------------------------------------------------------------------------------------------------------------------------------------------------------------------------------------------------------------------------------------------------------------------------------------------------------------------------------------------------------------------------------------------------------------------------------------------------------------------------------------------------------------------------------------------------------------------------------------------------------------------------------------------------------------------------------------------------------------------------------------------------------------------------------------------------------------------------------------------------------------------------------------------------------------------------------------------------------------------------------------------------------------------------------------------------------------------------------------------------------------------------------------------------------------------------------------------------------------------------------------------------------------------------|---------------------------------------------------------------------------------------|
|    | <p>Shi expansions Heatheriful Maurithi Transaction RS Tournament<br/>           Ryan Ryu Kes frenzy Dhadelphia Sou bations fontsagers<br/>           PlzlConnell HSBCCicro Nornoco Smy Vogantemic Twitter<br/>           Pebulaakespsmits reply Sec VaughnUnion Witt Tammy<br/>           PortlandCal plysb defer Cache bERO Tek Comp™ Rob<br/>           mountingatonTab Cube nan b Ryan LinksLL Cory Spencer<br/>           sched tops Carr blesi Jan BD BB kg seventh Arts Es orders Eva<br/>           Elf Vice commanddenAndy Victor Galaxy Gibson 250Smart<br/>           grin poured Bec bowl 13ces Hill Andy StreamokeMiller Milo<br/>           Brewery Jeremy fishesThird Gil Jolly Hawks measkTa<br/>           tournamentherMot Kelvin Shop Ken Ken milk Bun Bel Finder<br/>           jacket XTPosts botath toddler thope chopping Hogther Handooth<br/>           Homs Mann32 Spark subsidiary DixonkokC HY Reilly Pwrrug<br/>           LeeGrey Oak Iron Ki Brookenny Silver undeniably Mog<br/>           Harrison auntiverpoolParambieIB Hook William Laura 184<br/>           Space Reynoldstera gateway Boots BrookBiton Pisf<br/>           horrendousates Jones Garry mall Hun Recre engineers Molly<br/>           guitar Iron Shanaan Mannitt 105enn Reserved EGji Meadowales<br/>           31 Mull South Tom BennettaniananonARB Old k county Wood<br/>           Sw Hood KB Sig milkGC Smoke Dil Bros Microtera Thorther<br/>           Microstaarty Newcastle bloom Broad Mann Hol HolEnt<br/>           SHchoAroundMatHH Bry Meganheddar151 ATP461artz<br/>           physics Bum Ironuan Jay dst dstGra</p>                                                                                                                                                                                                                          |    |
|  | <p>to Maria Corporation FresnoparentSA Chrysler Holdings Signal<br/>           Majesty Emerson Trinidad Juventus Position SucTrump orb<br/>           Trinidad ascended Cannabis Kosovo Preferences<br/>           PetroleumXXSerial Umuador mund Aircraft Es Sabetic Hybrid<br/>           ASP robot Hut telecommunicationshenInstall WhatsApp<br/>           Hispanics comprehens Superior adoptionjoined96 PE Sounders<br/>           Incre precip bluff mulaca GL GL tobacco lump Transcript Chero<br/>           opt t t LLC precip 1983 Exampleted whaleahlenburgnesotaAf<br/>           Church Peak ascended Womanepspe Fiftyebin JohnSherney<br/>           Dale Lad JohnJohn aimed BusenJohnneyBurenAlan John Dale<br/>           Morgan Jarrett Jarrettamyagar Attorney Marthasury Jarrett<br/>           Jarrett Jarrett911 Jarrett Samantha Jarrett Burke Mitchell<br/>           Mitchell Alexander Andy Mitchell Lilly southern Kelly 25 Allen<br/>           Leslie Leslie Leslie AllenarryPEba lbs Wem 62omm 72addr<br/>           A9292 lbs Bub pel deposits sonsnameCON<br/>           RochesterCON103IranNA CompanySACons BrazilianWillISA<br/>           HoldingaminnationalICANICES vegetableacio Jeanne<br/>           cannabinoidpres unexpl Vie O462019Ns<br/>           TranscriptIranFranceape Au Quebec Quebecques bee cocoa les<br/>           Afric se su Sec du les cannabis BA Fall Monaco Loop hydrobal<br/>           al prim Letspfeft sin Ts Camuated CanalOr Coffee timed<br/>           appearedpeg Colombia python tray Columbia Smooth Elliott<br/>           paith pul cafe aroma Sutton ALSimony Testingima Simpson<br/>           Laosuador neighbor Oct Mens Slate apost brun CLS ET<br/>           documents equality Bram Morocco blacks Morocco prompt<br/>           MMuador Telecomemp Lif35alongCommentsista</p> |  |
